# Supplementary material
Source: publisher figshare collection journal article supplement (https://tandf.figshare.com/articles/dataset/_/21829233)
Supplement: Supplementary file 1 [file 1]

---

**Title** 辩证行为疗法对创伤后应激障碍女性患者分离状态（伴或不伴有边缘人格障碍）的温和疗效

Nikolaus Kleindienst, Kathlen Priebe, Nora Görg, Anne Dyer, Regina Steil, Lisa Lyssenko, Dorina Winter, Christian Schmahl and Martin Bohus

**Abstract**

背景：PTSD 患者倾向于出现分离性症状，这在理论上会对成功治疗产生干扰，但大部分实证性研究没有证实这个假设。

目的：本研究的主要目的是了解状态性分离是否可以预测辩证行为疗法（DBT-PTSD）能成功用于儿童期性虐待（CSA）PTSD 患者。我们还进一步探讨状态性分离和特质性分离的区别是否可以预测治疗的效果。

方法：基于因果倒置假设分析，我们提出了一项有关 CSA 后 PTSD 患者效果的随机对照研究。在积极治疗组 (DBT-PTSD) 女性, 采用专业人员版 PTSD 量表(CAPS)及创伤后诊断量表评估了治疗前后的改善, 并把这种改善与分离的关系进行了回归分析。用于分析混杂因素的多变量模型被用来把 CAPS 及 PDS 评估的治疗改善与（1）在每次治疗后评价状态性分离（2）在基线时评估的特质性分离联系起来进行分析。

结果：心理治疗期间的状态性分离可以预测 DBT-PTSD 的治疗效果：在治疗期间比较低的状态分离患者有较高机会出现实质性提高。在伴有或不伴有边缘人格障碍的亚组 PTSD 患者该现象也存在。对状态性分离和特质性分离进行区别是有必要的，因为特质性分离对疗效没有预测作用。

结论：在治疗期间的分离症状可能减少诸如 DBT-PTSD 聚焦于创伤治疗方法的成功率。因此开展旨在从分离症状着手来改善疗效的临床研究是必要的。

**Keywords:** 边缘型人格障碍；儿童期虐待；辩证行为疗法；分离；暴露疗法；创伤后应激障碍；心理治疗

Name of translator: Xiwen Hu, Zhonglin Tan

**Citation:** European Journal of Psychotraumatology 2016, 7: 30375 - <http://dx.doi.org/10.3402/ejpt.v7.30375>
