# Supplementary material
Source: publisher figshare collection journal article supplement (https://tandf.figshare.com/articles/dataset/_/21829233)
Supplement: Supplementary file 2 [file 1]

Stan dysocjacji jako moderator odpowiedzi na dialektyczną terapię behawioralną PTSD wśród kobiet z i bez zaburzeń osobowości borderline.

Nikolaus Kleindienst, Kathlen Priebe, Nora Görg, Anne Dyer, Regina Steil, Lisa Lyssenko, Dorina Winter, Christian Schmahl and Martin Bohus

Wprowadzenie: Pacjenci z PTSD są podatni na stany dysocjacji, co, teoretycznie, powinno ułatwiać proces psychoterapii. Jednakże większość doniesień empirycznych nie potwierdza tej tezy.

Cel: Celem tej pracy było sprawdzenie, czy stan dysocjacji może być predyktorem sukcesu w adaptacji do dialektycznej terapii behawioralnej ukierunkowanej na leczenie PTSD wywołanego traumą wykorzystania seksualnego.

Metoda: Prezentujemy analizie post-hoc próby losowej pacjentów z PTSD z tego rodzaju traumą. Do zbadania skuteczności terapii oraz jej związku ze stanem dysocjacji użyto regresji logistycznej oraz modeli wielowymiarowych, gdzie badani byli przyporządkowywani do dwóch podgrup: 1. stan dysocjacji mierzony po każdej sesji; 2. dysocjacja jako względnie trwała cecha. Wyniki: Stan dysocjacji podczas psychoterapii był predyktorem skuteczności wyżej wspomnianej metody psychoterapii PTSD: pacjenci z niskim stanem dysocjacji podczas leczenia mieli większe szanse poprawy. Takiego wyniku nie uzyskano dla dysocjacji operacjonalizowanej jako względnie trwała cecha.

Konkluzje: Podwyższony stan dysocjacji może redukować skuteczność dialektycznej terapii behawioralnej PTSD. .

Słowa kluczowe: zaburzenie osobowości borderline; wykorzystanie dziecięce; dialektyczna terapia behawioralna; dysocjacja; terapia ekspozycyjna; PTSD; psychoterapia

Keywords:

Name of translator: Marcin Rzesutek, University of Finance and Management in Warsaw, Poland
