# Supplementary material
Source: publisher figshare collection journal article supplement (https://tandf.figshare.com/articles/dataset/_/21829233)
Supplement: Supplementary file 3 [file 1]

## **Sınırdurum Kişilik Bozukluğu olan ve olmayan kadınlarda travma sonrası stres bozukluğu için uygulanan diyalektik davranışçı terapiye verilen cevabı durum dissosiyasyonu modere etmesi**

Nikolaus Kleindienst, Kathlen Priebe, Nora Görg, Anne Dyer, Regina Steil, Lisa Lyssenko, Dorina Winter, Christian Schmahl and Martin Bohus

### **Arkaplan**

Arkaplan: travma sonrası stres bozukluğu (TSSB) olan kişiler teoride başarılı tedavi sürecine müdahale eden dissosiyasyon yatkındırlar. Buna rağmen çoğu ampirik çalışma bu varsayımı doğruluğunu ispat etmemiştir.

Amaç: İlk amaç dissosiyasyon durumunun çocukluk dönemi cinsel taciz sonrası TSSB yaşayan hastalar için dizayn edilmiş diyalektik davranışçı terapinin (CAS) (DBT-PTSD) adaptasyonunun başarısını tahmini için test etmektir. Daha sonra dissosiyasyon durum ve özellik dissosiyasyon olarak ölçülebilir şekilde tanımlanmasının gelişmeyi tahmini için bir fark yaratıp yaratmadığı yönünde keşfetmek olacaktır.

Yöntemler: Çocukluk dönemi cinsel taciz sonrası TSSB yaşayan hastalarda etkililik üzerinde rastgele kontrol edilen denemeleri hipotezden çıkılarak post hoc analizler yapılmıştır.

Dissosiyasyon için Travma Sonrası Tanı Ölçeği ve Clinician Administered PTSD Scale (CAPS) içindeki öncesi-sonrası gelişmelerle ilgili olarak regresyon analizi aktif tedavi koluna katılan kadınlara uygulanmıştır. Sürece etki edebilecek diğer değişkenler de alınarak çok değişkenli modeller temel seviyede değerlendirilen özellik olarak dissosiyasyon ve her tedavi seansı sonrası değerlendirilen durum dissosiyasyona yönelik PDS ve CAPS içindeki gelişmeleri ilişkilendirmek için kullanılmıştır.

Sonuç: Psikoterapi seansları boyunca durum dissosiyasyonu DBT-PTSD sonrası gelişmeleri tahmin etmiştir. Tedavi boyunca düşük durum dissosiyasyonu gösteren önemli bir gelişme göstermek için daha yüksek şansa sahipti. Bu ilişki hem sınırdurum kişiliği olan hem olmayan gruplardaki TSSB hastalarının alt gruplarında sürekli olarak oluşmuştur. Dissosiyasyonun hem durum hem özellik olarak tanımlanması gelişme süresince fark yaratmıştır, bu gelişme özellik olarak dissosiyasyondan tahmin edilememektedir.

Tartışma: Tedavi süresince dissosiyasyon DBT-PTSD gibi travma odaklı terapilerdeki başarıyı azaltabilir. Buna göre, dissosiyasyonu tanımlayacak gelişmiş yolları amaçlayan klinik çalışmalara ihtiyaç duyulmaktadır.

Anahtar Kelimeler: Sınırdurum kişilik bozukluğu; çocukluk dönemi taciz; diyalektik davranışçı terapi; dissosiyasyon; maruz bırakma terapisi; travma sonrası stres bozukluğu; psikoterapi

Name of translator: Seray Akça

Citation: European Journal of Psychotraumatology 2016, 7: 30375 - <http://dx.doi.org/10.3402/ejpt.v7.30375>
