# Supplementary material
Source: publisher figshare collection journal article supplement (https://tandf.figshare.com/articles/dataset/_/21829233)
Supplement: Supplementary file 4 [file 1]

**Title: Состояние диссоциации влияет на (модерирует) реакцию на диалектическую поведенческую терапию для Пост-травматического стрессового расстройства среди женщин с пограничным расстройством личности**

Nikolaus Kleindienst, Kathlen Priebe, Nora Görg, Anne Dyer, Regina Steil, Lisa Lyssenko, Dorina Winter, Christian Schmahl and Martin Bohus

Базовая информация: Пациенты с Пост-травматическим стрессовым расстройством (ПТСР) склонны к диссоциации, что, теоретически, должно мешать успешному лечению. Хотя, большинство эмпирических исследований не подтверждают данное допущение. Задача исследования: первичная задача исследования состояла в том что бы проверить, насколько состояние диссоциации может предсказать результат диалектической поведенческой терапии для лечения пациентов с ПТСР развившимся в результате сексуально насилия в детстве (ДПТ-ПТСР). Мы также рассмотрели насколько операционализации диссоциации как состояния (State dissociation) vs признака (dissociation as Trait) дало разницу в плане предсказания изменения состояния здоровья пациентов в результате терапии.

Методы: Был применен ведомый гипотезой последующий анализ случайной контролируемой выборки эффективности терапии среди пациентов с ПТСР подвергшихся сексуальному насилию в детстве. Был проведен регрессивный анализ результатов пре- и пост-оценки женщин которые участвовали в терапии (ДПТ-ПТСР). Оценка проводилась при помощи проводимой клиницистом шкале ПТСР (CAPS) и Пост-травматической диагностической шкале (PDS) по диссоциации. Мультивариативные модели подсчета были применены для сопоставления изменения состояния пациентов показанным как по CAPS так и по PDS с (1) состоянием диссоциации измеренным после каждой сессии, и (2) диссоциацией как признаком измеренным до начала терапии.

Результаты: Состояние диссоциации в процессе психотерапевтических сессий предсказало изменение состояния пациентов после ДПТ-ПТСР: пациенты с низким показателем состояния диссоциации в процессе лечения имели более высокий шанс показать значительное улучшение. Эта связь последовательно была выявлена в подгруппах пациентов с ПТСР, как страдающих так и не страдающих пограничным расстройством личности. Операционализация диссоциации как состояния (против его определения как признака) дало разницу, так как наличие диссоциации как признака не предсказывало изменение состояния значимо.

Выводы: Диссоциация в процессе лечения (психотерапевтических сессий) может снизить успех такой травма-фокусированной терапии, как ДПТ-ПТСР. Следовательно, необходимы клинические исследования направленные на изучение того, как лучше работать с проблемой диссоциации.

Keywords: Пограничное расстройство личности, насилие над детьми, диалектическая поведенческая терапия, диссоциация, терапия экспозицией, Пост-травматическое стрессовое расстройство, психотерапия

Name of translator: Jana Darejan Javakhishvili

Citation: European Journal of Psychotraumatology 2016, 7: 30375 - <http://dx.doi.org/10.3402/ejpt.v7.30375>
