# Supplementary material
Source: publisher figshare collection journal article supplement (https://tandf.figshare.com/articles/dataset/_/21829233)
Supplement: Supplementary file 5 [file 1]

## **Dissoziation während der Therapiesitzungen moderiert das Ansprechen auf eine Dialektisch Behaviorale Therapie für Posttraumatischer Belastungsstörung. Eine empirische Studie zu Patientinnen mit und ohne Borderline-Persönlichkeitsstörung**

Nikolaus Kleindienst, Kathlen Priebe, Nora Görg, Anne Dyer, Regina Steil, Lisa Lyssenko, Dorina Winter, Christian Schmahl, Martin Bohus

**Hintergrund:** Patienten mit Posttraumatischer Belastungsstörung (PTBS) weisen eine hohe Dissoziationsneigung auf. Theoretische Überlegungen legen es nahe, dass sich Dissoziation negativ auf den Therapieerfolg auswirkt. Allerdings wird diese Annahme durch die meisten empirischen Studien nicht bestätigt.

**Studienziel:** Das Hauptziel ist die Überprüfung der Hypothese, dass Dissoziation während der Therapiesitzungen das Ansprechen auf DBT-PTSD (eine Adaptation der Dialektisch Behavioralen Therapie für Patienten mit PTBS) vorhersagt. Darüber hinaus untersuchen wir, ob die Vorhersage des Therapieerfolgs von der Operationalisierung des Prädiktors (Dissoziation während der Therapiesitzungen vs. Dissoziationsneigung) abhängt.

**Methoden:** Es wurden hypothesengeleitete post-hoc Analysen zu einer randomisiert kontrollierten Wirksamkeitsstudie bei Patientinnen mit PTBS nach sexuellem Missbrauch in der Kindheit vorgenommen. Für die Patientinnen des aktiven Therapiearms wurden Regressionsanalysen zur Prädiktion der prä-post Verbesserungen in der CAPS (Clinician-Administered PTSD Scale) und in der PDS (Posttraumatic Diagnostic Scale) durchgeführt. Hierbei wurden die Verbesserungen in der CAPS bzw. PDS unter Berücksichtigung potentiell konfundierender Variablen i) mit der Dissoziation während der Therapiesitzungen und ii) mit der Dissoziationsneigung zu Studienbeginn in Verbindung gebracht.

**Ergebnisse:** Die Dissoziation während der Therapiesitzungen sagte das Ausmaß der Verbesserung nach DBT-PTSD vorher. Patientinnen mit geringer Dissoziation während der Therapiesitzungen hatten eine erheblich höhere Chance auf eine deutliche Verbesserung. Dieser Zusammenhang zeigte sich sowohl für die Subgruppen von PTBS-Patientinnen mit und ohne komorbider Borderline-Persönlichkeitsstörung. Die Vorhersage des Therapieerfolgs aufgrund der Dissoziationsneigung war (im Gegensatz zur Vorhersage aufgrund der Dissoziation während der Therapiesitzungen) nicht signifikant.

**Schlussfolgerungen:** Dissoziation während der Therapiesitzungen kann den Therapieerfolg Trauma-fokussierender Therapien wie der DBT-PTSD beeinträchtigen. Daher sind klinische Studien zur Behandlung der Dissoziation angezeigt.

**Citation:** European Journal of Psychotraumatology 2016, 7: 30375 - <http://dx.doi.org/10.3402/ejpt.v7.30375>
